# Supplementary material for: DNA-Based Method for Traceability and Authentication of Apis cerana and A. dorsata Honey (Hymenoptera: Apidae), Using the NADH dehydrogenase 2 Gene
Source: MDPI journal article supplement (doi:10.3390/foods11070928), 2022-03-23
Supplement: s1 [file s1]

**Table S1.** The honey samples, and their labels and localities used for analysis.

| No. | Entomological label | Locality                | Co-ordination     | Name   | Provider     |
|-----|---------------------|-------------------------|-------------------|--------|--------------|
| 1   | <i>A. cerana</i>    | Thailand, Chiang Mai    | 18.94°N, 99.36°E  | CThai1 | Beekeeper    |
| 2   | <i>A. cerana</i>    | Thailand, Chantaburi    | 12.66°N, 101.92°E | CThai2 | Beekeeper    |
| 3   | <i>A. cerana</i>    | Thailand, Phayao        | 19.33°N, 99.92°E  | CThai3 | Beekeeper    |
| 4   | <i>A. cerana</i>    | Thailand, Chiang Rai    | 19.68°N, 99.35°E  | CThai4 | Beekeeper    |
| 5   | <i>A. cerana</i>    | Thailand, Patthalung    | 7.80°N, 100.01°E  | CThai5 | Beekeeper    |
| 6   | <i>A. cerana</i>    | Nepal, Pokhara          | 28.20°N, 83.98°E  | CNep1  | Beekeeper    |
| 7   | <i>A. cerana</i>    | Nepal, Pokhara          | 28.20°N, 83.58°E  | CNep2  | Beekeeper    |
| 8   | <i>A. cerana</i>    | South Korea             | 36.40°N, 128.49°E | CSK1   | Beekeeper    |
| 9   | <i>A. cerana</i>    | South Korea             | 36.40°N, 128.49°E | CSK2   | Beekeeper    |
| 10  | <i>A. cerana</i>    | South Korea             | 36.32°N, 128.48°E | CSK3   | Beekeeper    |
| 11  | <i>A. dorsata</i>   | Thailand, Nakorn Sawan1 | 15.59°N, 100.43°E | DThai1 | Honey hunter |
| 12  | <i>A. dorsata</i>   | Thailand, Nakorn Sawan2 | 15.59°N, 100.43°E | DThai2 | Honey hunter |
| 13  | <i>A. dorsata</i>   | Thailand, Phetchaburi   | 12.95°N, 99.66°E  | DThai3 | Honey hunter |
| 14  | <i>A. dorsata</i>   | Thailand, Chiang Mai    | 18.73°N, 98.94°E  | DThai4 | Honey hunter |
| 15  | <i>A. dorsata</i>   | Thailand, Tak           | 17.05°N, 99.12°E  | DThai5 | Honey hunter |
| 16  | <i>A. mellifera</i> | South Korea             | 36.40°N, 128.49°E | MSK1   | Beekeeper    |
| 17  | <i>A. mellifera</i> | South Korea             | 36.40°N, 128.49°E | MSK2   | Beekeeper    |
| 18  | <i>A. mellifera</i> | South Korea             | 35.31°N, 127.59°E | MSK3   | Beekeeper    |
| 19  | <i>A. mellifera</i> | South Korea             | 36.32°N, 128.48°E | MSK4   | Beekeeper    |
| 20  | <i>A. mellifera</i> | South Korea             | 36.32°N, 128.48°E | MSK5   | Beekeeper    |

**Table S2.** Mitochondrial sequences of honeybees (*A. cerana*, *A. dorsata* and *A. mellifera*) used to design species-specific primers.

| No. | Sample ID number               | Locality                         | GenBank accession no. | Reference |
|-----|--------------------------------|----------------------------------|-----------------------|-----------|
| 1   | <i>Apis cerana</i>             | China                            | KM244704              | [55]      |
| 2   | <i>Apis cerana</i>             | China, Yunnan                    | GQ162109              | [55]      |
| 3   | <i>Apis cerana</i>             | South Korea                      | KX908206              | [56]      |
| 4   | <i>Apis cerana</i>             | South Korea                      | AP018431              | [48]      |
| 5   | <i>Apis cerana</i>             | Malaysia                         | AP018149              | [51]      |
| 6   | <i>Apis cerana</i>             | Japan, Nagasaki, Tsushima Island | AP017985              | [52]      |
| 7   | <i>Apis cerana</i>             | Taiwan, Taipei                   | AP017984              | [52]      |
| 8   | <i>Apis cerana</i>             | China, Jiangsu                   | AP017983              | [52]      |
| 9   | <i>Apis cerana</i>             | Japan, Amami Oshima Island       | AP017941              | [52]      |
| 10  | <i>Apis cerana</i>             | Japan, Kyoto                     | AP017314              | [54]      |
| 11  | <i>Apis dorsata</i>            | Thailand                         | AP018369              | [53]      |
| 12  | <i>Apis dorsata</i>            | Thailand, Chiang Rai             | KX908207              | [56]      |
| 13  | <i>Apis dorsata</i>            | China                            | KC294229              | [57]      |
| 14  | <i>Apis mellifera capensis</i> | South Africa                     | MG552681              | [43]      |
| 15  | <i>Apis mellifera capensis</i> | South Africa                     | MG552682              | [43]      |
| 16  | <i>Apis mellifera capensis</i> | South Africa                     | MG552683              | [43]      |
| 17  | <i>Apis mellifera capensis</i> | South Africa                     | MG552684              | [43]      |
| 18  | <i>Apis mellifera capensis</i> | South Africa                     | MG552685              | [43]      |

|    |                                                                 |                                           |          |                               |
|----|-----------------------------------------------------------------|-------------------------------------------|----------|-------------------------------|
| 19 | <i>Apis mellifera capensis</i>                                  | South Africa                              | MG552686 | [43]                          |
| 20 | <i>Apis mellifera capensis</i>                                  | South Africa                              | MG552687 | [43]                          |
| 21 | <i>Apis mellifera capensis</i>                                  | South Africa                              | MG552688 | [43]                          |
| 22 | <i>Apis mellifera capensis</i>                                  | South Africa                              | MG552689 | [43]                          |
| 23 | <i>Apis mellifera capensis</i>                                  | South Africa                              | MG552690 | [43]                          |
| 24 | <i>Apis mellifera capensis</i>                                  | South Africa                              | MG552691 | [43]                          |
| 25 | <i>Apis mellifera capensis</i>                                  | South Africa                              | MG552692 | [43]                          |
| 26 | <i>Apis mellifera capensis</i>                                  | South Africa                              | MG552693 | [43]                          |
| 27 | <i>Apis mellifera capensis</i>                                  | South Africa                              | MG552694 | [43]                          |
| 28 | <i>Apis mellifera capensis</i>                                  | South Africa                              | MG552695 | [43]                          |
| 29 | <i>Apis mellifera capensis</i>                                  | South Africa                              | MG552696 | [43]                          |
| 30 | <i>Apis mellifera capensis</i> * <i>A. mellifera scutellata</i> | South Africa                              | MG552697 | [43]                          |
| 31 | <i>Apis mellifera scutellata</i>                                | South Africa                              | MG552698 | [43]                          |
| 32 | <i>Apis mellifera scutellata</i>                                | South Africa                              | MG552699 | [43]                          |
| 33 | <i>Apis mellifera scutellata</i>                                | South Africa                              | MG552700 | [43]                          |
| 34 | <i>Apis mellifera scutellata</i>                                | South Africa                              | MG552701 | [43]                          |
| 35 | <i>Apis mellifera scutellata</i>                                | South Africa                              | MG552702 | [43]                          |
| 36 | <i>Apis mellifera scutellata</i>                                | South Africa                              | MG552703 | [43]                          |
| 37 | <i>Apis mellifera monticola</i>                                 | east African honey bee, reared in Germany | MF678581 | [40]                          |
| 38 | <i>Apis mellifera</i>                                           | Jordan?                                   | MF059100 | Haddad, unpublished           |
| 39 | <i>Apis mellifera mellifera</i>                                 | Norway                                    | KY926884 | Eimanifar et al., unpublished |
| 40 | <i>Apis mellifera intermissa</i>                                | Morocco                                   | KY926883 | Eimanifar et al., unpublished |
| 41 | <i>Apis mellifera scutellata</i>                                | Germany                                   | KY614238 | Eimanifar et al., unpublished |
| 42 | <i>Apis mellifera lamarckii</i>                                 | Germany (Egypt source)                    | KY464958 | [41]                          |
| 43 | <i>Apis mellifera meda</i>                                      | Germany                                   | KY464957 | [42]                          |
| 44 | <i>Apis mellifera ligustica</i>                                 | Italy                                     | KX908209 | [56]                          |
| 45 | <i>Apis mellifera capensis</i>                                  | South Africa                              | KX870183 | [39]                          |
| 46 | <i>Apis mellifera syriaca</i>                                   | Levant Region                             | KP163643 | [46]                          |
| 47 | <i>Apis mellifera intermissa</i>                                | Algeria                                   | KM458618 | [47]                          |
| 48 | <i>Apis mellifera scutellata</i>                                | Mexico: Queretaro                         | KJ601784 | [45]                          |
| 49 | <i>Apis mellifera mellifera</i>                                 | ?                                         | KJ396181 | [44]                          |
| 50 | <i>Apis mellifera</i>                                           | New Zealand                               | AP018435 | [49]                          |
| 51 | <i>Apis mellifera</i>                                           | United Kingdom                            | AP018432 | [50]                          |

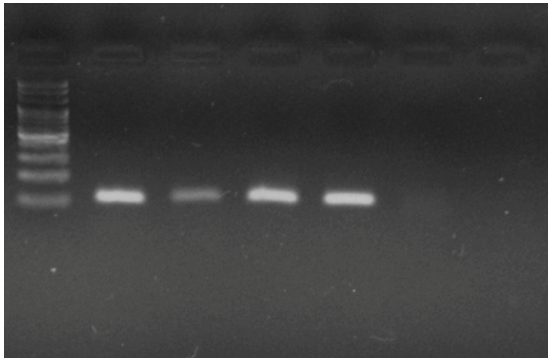

**Figure S1.** Preliminary specificity test of ACF/ACR (Suarez et al., 2018) using DNA extracts of honeybees. DNA: Lane 1, *A. dorsata* (Nepal); Lane 2, *A. dorsata* (Thailand); Lane 3, *A. cerana* (South Korea); Lane 4, *A. cerana* (Nepal); Lane 5, *A. mellifera* (South Korea); Lane 6, *A. mellifera* (Thailand); Lane M, DNA marker.

## References

40. 39. Eimanifar, A., R. T. Kimball, E. L. Braun, and J. D. Ellis. 2016. The complete mitochondrial genome of the Cape honey bee Esch., *Apis mellifera capensis* (Insecta: Hymenoptera: Apidae). *Mitochondrial DNA Part B* 1: 817–819.
40. Eimanifar, A., R. T. Kimball, E. L. Braun, S. Fuchs, B. Grünewald, and J. D. Ellis. 2017a. The complete mitochondrial genome of an east African honey bee, *Apis mellifera monticola* Smith (Insecta: Hymenoptera: Apidae), *Mitochondrial DNA Part B* 2(2): 589–590.
41. Eimanifar, A., R. T. Kimball, E. L. Braun, D. M. Moustafa, N. Haddad, S. Fuchs, B. Grünewald, and J. D. Ellis. 2017b. The complete mitochondrial genome of the Egyptian honey bee, *Apis mellifera lamarckii* (Insecta: Hymenoptera: Apidae). *Mitochondrial DNA Part B* 2: 270–272.
42. Eimanifar, A., R. T. Kimball, E. L. Braun, S. Fuchs, B. Grünewald, and J. D. Ellis. 2017c. The complete mitochondrial genome of *Apis mellifera meda* (Insecta: Hymenoptera: Apidae). *Mitochondrial DNA Part B* 2: 268–269.
43. Eimanifar, A., R. T. Kimball, E. L. Braun, and J. D. Ellis. 2018. Mitochondrial genome diversity and population structure of two western honeybee subspecies in the Republic of South Africa. *Sci. Rep.* 8: 1333.
44. Fuller, Z. L., E. L. Nino, H. M. Patch, O. C. Bedoya-Reina, T. Baumgarten, E. Muli, F. Mumoki, A. Ratan, J. McGraw, M. Frazier, D. Masiga, S. Schuster, C. M. Grozinger, and M. Miller 2015. Genome-wide analysis of signatures of selection in populations of African honey bees (*Apis mellifera*) using new web-based tools. *BMC Genomics* 16: 518.
45. Gibson, J. D., and G. J. Hunt. 2016. The complete mitochondrial genome of the invasive Africanized honey bee, *Apis mellifera scutellata* (Insecta: Hymenoptera: Apidae). *Mitochondrial DNA Part A* 27(1): 561–562.
46. Haddad, N. J. 2016. Mitochondrial genome of the Levant Region honey bee, *Apis mellifera syriaca* (Hymenoptera: Apidae). *Mitochondrial DNA Part A* 27(6): 4067–4068.

47. Hu, P., Z. X. Lu, N. Haddad, A. Nouredine, W. Loucif-Ayad, Y. Z. Wang, R. B. Zhao, A. L. Zhang, X. Guan, H. X. Zhang, and H. Niu. 2016. Complete mitochondrial genome of the Algerian honey bee, *Apis mellifera intermissa* (Hymenoptera: Apidae). *Mitochondrial DNA Part A* 27(3): 1791–1792.
48. Ilyasov, R. A., J. Park, J. Takahashi, H. W. Kwon. 2018. Phylogenetic uniqueness of honeybee *Apis cerana* from the Korean peninsula inferred from the mitochondrial, nuclear, and morphological data. *J. Apicul. Sci.* 62 (2): 189–214.
49. Nakagawaa, I., M. Maedaa, M. Chikanoa, H. Okuyamaa, R. Murrayb, and J. Takahashia. 2018. The complete mitochondrial genome of the yellow coloured honeybee *Apis mellifera* (Insecta: Hymenoptera: Apidae) of New Zealand. *Mitochondrial DNA Part B* 3(1): 66–67.
50. Okuyama, h., J. Hill, S. J. Martin, and J. Takahashi. 2018. The complete mitochondrial genome of a Buckfast bee, *Apis mellifera* (Insecta: Hymenoptera: Apidae) in Northern Ireland. *Mitochondrial DNA Part B* 3(1): 338–339.
51. Okuyama, H., S. Tingek, and J. Takahashi. 2017a. The complete mitochondrial genome of the cavity-nesting honeybee, *Apis cerana* (Insecta: Hymenoptera: Apidae) from Borneo, *Mitochondrial DNA Part B* 2(2): 475–476.
52. Okuyama, H., R. Jimi, T. Wakamiya, and J. Takahashi. 2017b. Complete mitochondrial genome of the honeybee *Apis cerana* native to two remote islands in Japan. *Conserv. Genet. Resour.* 9: 557–560
53. Takahashi, J., S. Deowanish, and H. Okuyama. 2017. Analysis of the complete mitochondrial genome of the giant honeybee, *Apis dorsata*, (Hymenoptera: Apidae) in Thailand. *Conserv. Genet. Resour.* <https://doi.org/10.1007/s12686-017-0942-7>
54. Takahashi, J., T. Wakamiya, T. Kiyoshi, H. Uchiyama, S. Yajima, K. Kimura, and T. Nomura. 2016. The complete mitochondrial genome of the Japanese honeybee, *Apis cerana japonica* (Insecta: Hymenoptera: Apidae). *Mitochondrial DNA Part B* 1(1): 156–157.
55. Tan, H.W., G. H. Liu, X. Dong, R. Q. Lin, H. Q. Song, S. Y. Huang, Z. G. Yuan, and X. Q. Zhao. 2011. The complete mitochondrial genome of the Asiatic cavity nesting honeybee *Apis cerana* (Hymenoptera: Apidae). *PLoS ONE* 6(8): e23008.
56. Wang, A. R., J. S. Kim, M. J. Kim, H. K. Kim, Y. S. Choi, and I. Kim. 2018. Comparative description of mitochondrial genomes of the honey bee *Apis* (Hymenoptera: Apidae): four new genome sequences and *Apis* phylogeny using whole genomes and individual genes. *J. Apic. Res.* 57(4): 484–503.
57. Yang, J., J. Xu, J. Wu, X. Zhang, and S. He. 2019. The complete mitogenome of wild honeybee *Apis dorsata* (Hymenoptera: Apidae) from South-Western China. *Mitochondrial DNA Part B* 4(1): 231–232.
